# Supplementary material
Source: ML conference proceedings conference paper supplement (https://proceedings.mlr.press/v139/wang21e.html)
Supplement: Supplementary file 1 [file wang21e-supp.pdf]

# The Supplementary Material for “Accelerate CNNs from Three Dimensions: A Comprehensive Pruning Framework”

## A. Why the Rank of $\Theta$ Is 1

### A.1. Experiments

In our original paper, we propose a model accuracy predictor (MAP):

$$\mathcal{F}(d, w, r; \Theta) = \sum_{q=1}^{\mathcal{R}} \mathcal{H}(d; \vec{s}_q) \mathcal{H}(w; \vec{u}_q) \mathcal{H}(r; \vec{v}_q), \quad (1)$$

where  $\mathcal{H}$  represents a univariate polynomial, and  $\mathcal{R}$  means the rank of  $\Theta$ . Pruning experiments shown in our original paper are done with  $\mathcal{R} = 1$  because we find that  $\mathcal{R} = 1$  is enough for an accurate approximation of MAP. In this case, Eq. (1) becomes:

$$\mathcal{F}(d, w, r; \Theta) = \mathcal{H}(d; \vec{s}) \mathcal{H}(w; \vec{u}) \mathcal{H}(r; \vec{v}). \quad (2)$$

We assume that  $\mathcal{R} = 1$  works well because it accords with the real distribution of  $\mathcal{F}(d, w, r)$ . To further verify the assumption, we design some experiments to show the relations between the model’s accuracy and  $(d, w, r)$ . Specifically, we train many ResNets and DenseNets with different  $(d, w, r)$ , and the results are in Table 1 — part of them have also been reported in the original paper. The observations are shown in their subtitles, from which we can draw the same conclusion as Eq. (2).

### A.2. Proof

Omitting all subscripts of  $d_1, w_1,$  and  $r_1$  of the equations in Table 1, we have:

$$\begin{aligned} \frac{\mathcal{F}(d_2, w, r)}{\mathcal{F}(d_2, w_2, r)} &\approx \frac{\mathcal{F}(d_2, w, r_2)}{\mathcal{F}(d_2, w_2, r_2)} \\ \Rightarrow \mathcal{F}(d_2, w, r) &\approx \frac{\mathcal{F}(d_2, w_2, r) \mathcal{F}(d_2, w, r_2)}{\mathcal{F}(d_2, w_2, r_2)}, \end{aligned} \quad (3)$$

$$\begin{aligned} \frac{\mathcal{F}(d, w, r)}{\mathcal{F}(d_2, w, r)} &\approx \frac{\mathcal{F}(d, w, r_2)}{\mathcal{F}(d_2, w, r_2)} \\ \Rightarrow \mathcal{F}(d, w, r) &\approx \frac{\mathcal{F}(d_2, w, r) \mathcal{F}(d, w, r_2)}{\mathcal{F}(d_2, w, r_2)}, \end{aligned} \quad (4)$$

$$\begin{aligned} \frac{\mathcal{F}(d, w, r_2)}{\mathcal{F}(d_2, w, r_2)} &= \frac{\mathcal{F}(d, w_2, r_2)}{\mathcal{F}(d_2, w_2, r_2)} \\ \Rightarrow \mathcal{F}(d, w, r_2) &= \frac{\mathcal{F}(d_2, w, r_2) \mathcal{F}(d, w_2, r_2)}{\mathcal{F}(d_2, w_2, r_2)}. \end{aligned} \quad (5)$$

Substituting Eq. (3) and Eq. (5) into Eq. (4), we have:

$$\begin{aligned} \mathcal{F}(d, w, r) &\approx \frac{\mathcal{F}(d, w_2, r_2) \mathcal{F}(d_2, w, r_2) \mathcal{F}(d_2, w_2, r)}{\mathcal{F}(d_2, w_2, r_2)^2} \\ &= \frac{\mathcal{H}(d; \vec{s}) \mathcal{H}(w; \vec{u}) \mathcal{H}(r; \vec{v})}{\mathcal{F}(d_2, w_2, r_2)^2}, \end{aligned} \quad (6)$$

Table 1. Accuracies (%) of ResNets and DenseNets on CIFAR-10 with different depths ( $d$ ), widths ( $w$ ) and resolutions ( $r$ ). The base models are ResNet-32 and DenseNet-40.

| (a) $\frac{\mathcal{F}(d_2, w_1, r_1)}{\mathcal{F}(d_2, w_2, r_1)} \approx \frac{\mathcal{F}(d_2, w_1, r_2)}{\mathcal{F}(d_2, w_2, r_2)}$ |       |       |       |       |       | (b) $\frac{\mathcal{F}(d_1, w_1, r_1)}{\mathcal{F}(d_2, w_1, r_1)} \approx \frac{\mathcal{F}(d_1, w_1, r_2)}{\mathcal{F}(d_2, w_1, r_2)}$ |       |       |       |       |       | (c) $\frac{\mathcal{F}(d_1, w_1, r_2)}{\mathcal{F}(d_2, w_1, r_2)} \approx \frac{\mathcal{F}(d_1, w_2, r_2)}{\mathcal{F}(d_2, w_2, r_2)}$ |       |       |       |       |       |
|-------------------------------------------------------------------------------------------------------------------------------------------|-------|-------|-------|-------|-------|-------------------------------------------------------------------------------------------------------------------------------------------|-------|-------|-------|-------|-------|-------------------------------------------------------------------------------------------------------------------------------------------|-------|-------|-------|-------|-------|
| ResNet ( $d = 1.0$ )                                                                                                                      |       |       |       |       |       | ResNet ( $w = 1.0$ )                                                                                                                      |       |       |       |       |       | ResNet ( $r = 1.0$ )                                                                                                                      |       |       |       |       |       |
| $w \backslash r$                                                                                                                          | 1.00  | 0.87  | 0.75  | 0.62  | 0.50  | $d \backslash r$                                                                                                                          | 1.00  | 0.87  | 0.75  | 0.62  | 0.50  | $w \backslash d$                                                                                                                          | 0.11  | 0.33  | 0.55  | 0.77  | 1.00  |
| 0.60                                                                                                                                      | 90.59 | 89.43 | 88.51 | 86.59 | 83.19 | 0.11                                                                                                                                      | 86.88 | 85.91 | 85.15 | 83.64 | 81.68 | 0.60                                                                                                                                      | 83.36 | 89.39 | 90.91 | 91.41 | 92.01 |
| 0.70                                                                                                                                      | 91.39 | 90.53 | 89.26 | 87.38 | 84.62 | 0.33                                                                                                                                      | 92.30 | 91.12 | 90.08 | 88.79 | 85.87 | 0.70                                                                                                                                      | 84.03 | 90.17 | 91.43 | 91.85 | 92.36 |
| 0.80                                                                                                                                      | 92.19 | 90.95 | 89.88 | 88.38 | 85.15 | 0.55                                                                                                                                      | 92.84 | 91.87 | 91.10 | 89.38 | 86.56 | 0.80                                                                                                                                      | 85.45 | 91.21 | 92.16 | 92.65 | 92.7  |
| 0.90                                                                                                                                      | 92.54 | 91.55 | 90.77 | 88.60 | 85.93 | 0.77                                                                                                                                      | 93.43 | 92.40 | 91.77 | 89.87 | 87.17 | 0.90                                                                                                                                      | 86.14 | 91.74 | 92.60 | 92.56 | 93.12 |
| 1.00                                                                                                                                      | 92.84 | 91.87 | 91.10 | 89.38 | 86.56 | 1.00                                                                                                                                      | 93.63 | 92.63 | 91.79 | 90.14 | 87.48 | 1.00                                                                                                                                      | 86.22 | 92.12 | 92.88 | 93.17 | 93.64 |
| DenseNet ( $d = 1.0$ )                                                                                                                    |       |       |       |       |       | DenseNet ( $w = 1.0$ )                                                                                                                    |       |       |       |       |       | DenseNet ( $r = 1.0$ )                                                                                                                    |       |       |       |       |       |
| $w \backslash r$                                                                                                                          | 1.00  | 0.87  | 0.75  | 0.62  | 0.50  | $d \backslash r$                                                                                                                          | 1.00  | 0.87  | 0.75  | 0.62  | 0.50  | $w \backslash d$                                                                                                                          | 0.20  | 0.40  | 0.60  | 0.80  | 1.00  |
| 0.60                                                                                                                                      | 90.82 | 90.48 | 89.62 | 88.04 | 85.63 | 0.20                                                                                                                                      | 88.16 | 87.64 | 86.77 | 85.50 | 83.83 | 0.60                                                                                                                                      | 84.51 | 88.82 | 89.95 | 91.40 | 92.70 |
| 0.70                                                                                                                                      | 91.54 | 90.98 | 90.19 | 88.79 | 86.75 | 0.40                                                                                                                                      | 92.00 | 91.22 | 90.32 | 89.15 | 86.89 | 0.70                                                                                                                                      | 85.43 | 89.26 | 90.51 | 92.35 | 92.83 |
| 0.80                                                                                                                                      | 91.99 | 91.57 | 90.59 | 90.01 | 87.67 | 0.60                                                                                                                                      | 93.03 | 92.06 | 91.85 | 90.63 | 88.42 | 0.80                                                                                                                                      | 86.92 | 90.75 | 91.07 | 93.01 | 93.66 |
| 0.90                                                                                                                                      | 92.74 | 92.08 | 91.19 | 90.56 | 88.12 | 0.80                                                                                                                                      | 93.80 | 93.21 | 92.78 | 91.74 | 89.25 | 0.90                                                                                                                                      | 87.88 | 91.74 | 91.46 | 93.14 | 93.86 |
| 1.00                                                                                                                                      | 93.09 | 92.25 | 92.05 | 90.68 | 88.38 | 1.00                                                                                                                                      | 94.53 | 93.75 | 93.69 | 92.21 | 89.84 | 1.00                                                                                                                                      | 88.16 | 92.00 | 93.03 | 93.80 | 94.53 |

where  $\frac{1}{\mathcal{F}(d_2, w_2, r_2)^2}$  is a constant and can be merged into any  $\mathcal{H}$ . Thus, Eq. (6) can be re-formulated as:

$$\mathcal{F}(d, w, r) \approx \mathcal{H}(d; \vec{s})\mathcal{H}(w; \vec{u})\mathcal{H}(r; \vec{v}), \quad (7)$$

which complies with Eq. (2).
